# Supplementary material
Source: PubMed Central journal article supplement (PMC4196258)
Supplement: NIHMS607217-supplement-1.pdf [file NIHMS607217-supplement-1.pdf]

## SUPPLEMENTARY FIGURE LENGEND

### **Fig. 1S**

A, western blot of human placental lysates with high and low LRP1 expression. Rat liver lysate was run on the same gel to serve as a positive control for LRP1. A minor band (arrowhead) with a molecular weight of 85 kDa may reflect heterogeneous pattern of glycosylation of LRP1, as has been previously reported for this protein in the placenta (Kristensen *et al.* 1990, May *et al.* 2003). B, western blot of placental samples probed for LRP1 and  $\beta$ -actin.

### **Fig. 2S**

Western blot of placental lysates with FPN. The left panel depicts human placental lysates with high and low expression of FPN protein as detected by the FPN antibody. The right panel shows the same placental lysates incubated with both the FPN antibody and its specific blocking peptide. The target band was completely blocked by the peptide.

**Figure 1S**

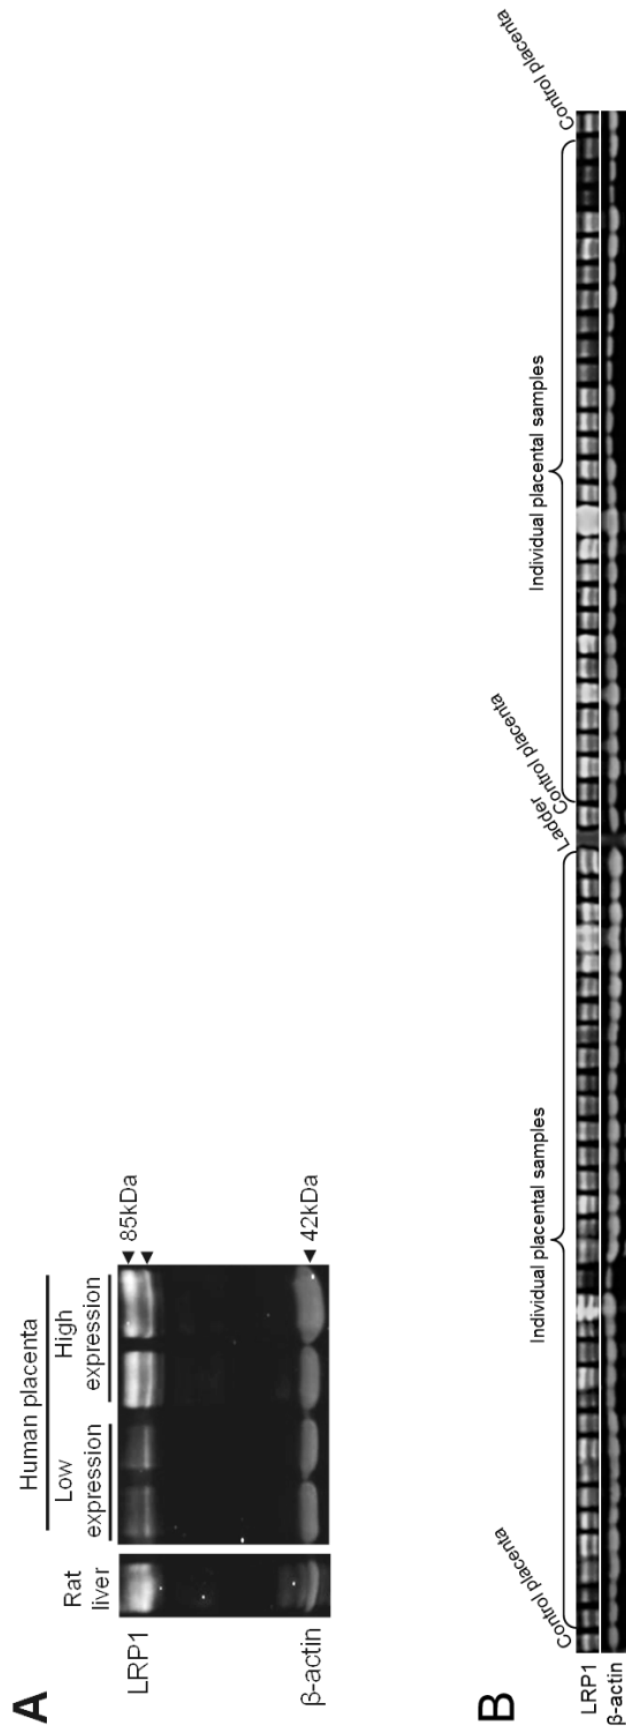

**Figure 2S**

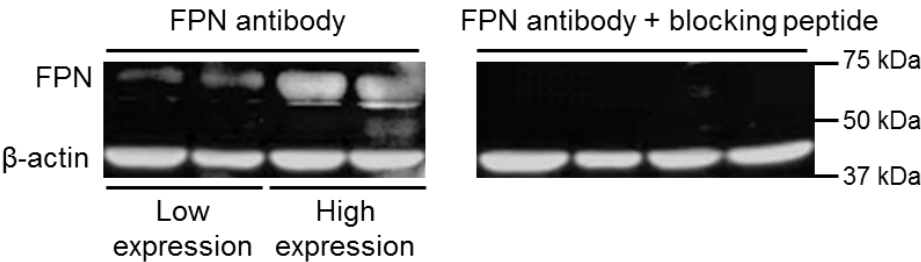

## References

- Kristensen T, Moestrup SK, Gliemann J, Bendtsen L, Sand O & Sottrup-Jensen L** 1990 Evidence that the newly cloned low-density-lipoprotein receptor related protein (LRP) is the alpha 2-macroglobulin receptor. *FEBS Lett* **276** 151-155.
- May P, Bock HH, Nimpf J & Herz J** 2003 Differential glycosylation regulates processing of lipoprotein receptors by gamma-secretase. *J Biol Chem* **278** 37386-37392.
